# Supplementary material for: Identification of MicroRNAs and Target Genes in the Fruit and Shoot Tip of Lycium chinense: A Traditional Chinese Medicinal Plant
Source: PubMed Central journal article supplement (PMC4294688; doi:10.1371/journal.pone.0116334), 2015-01-14
Supplement: pone.0116334.s005.pdf [file pone.0116334.s005.pdf]

**Table S3: List of secondary structures of identified novel miRNAs in *Lycium chinense*.**

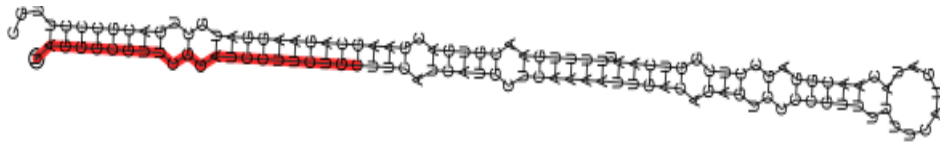

LC1

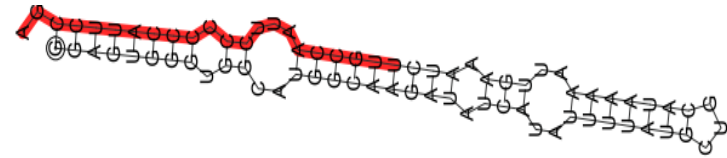

LC2

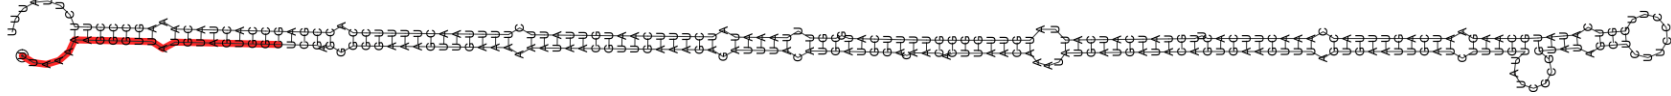

LC3

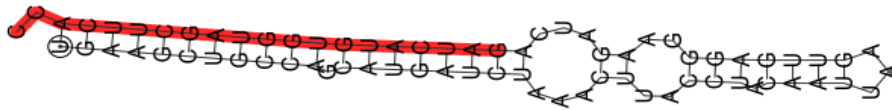

LC4

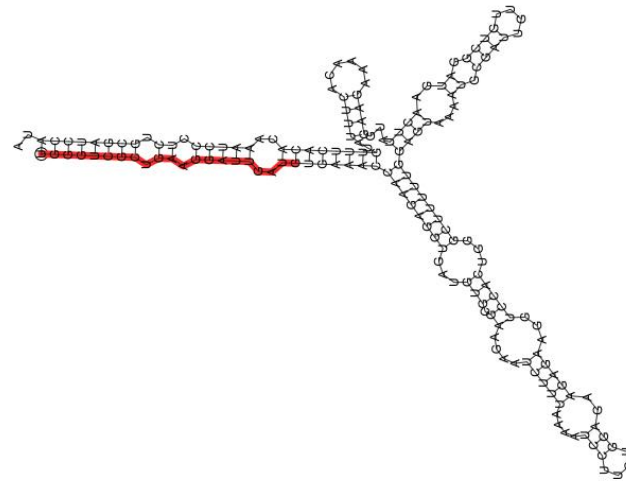

LC6

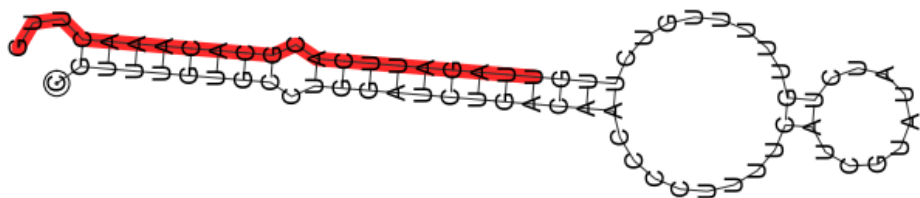

LC9

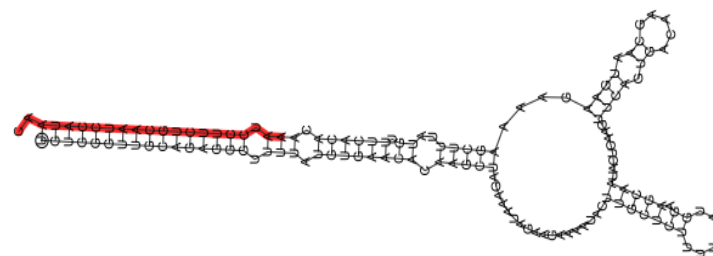

LC11

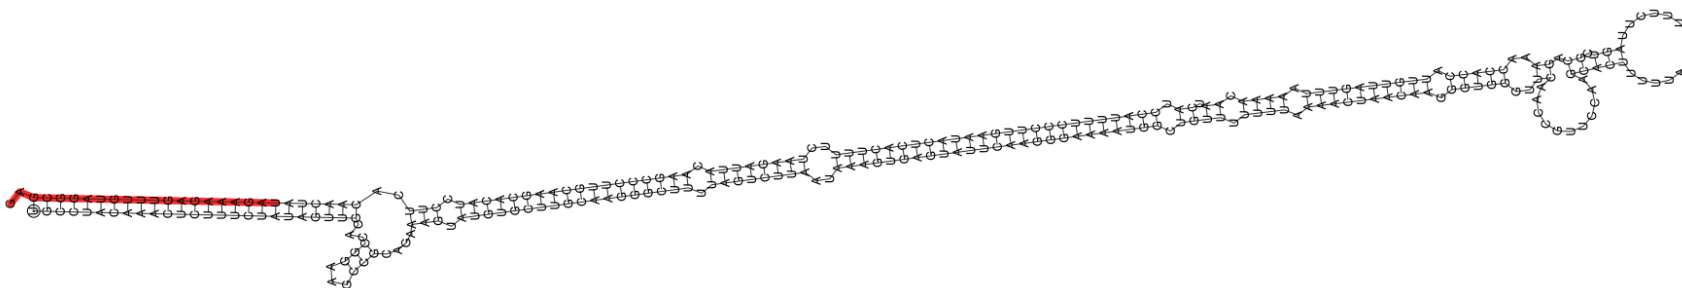

LC14

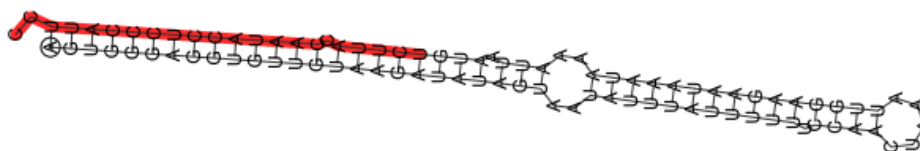

LC16

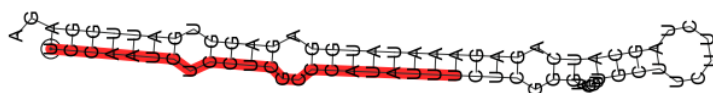

LC17

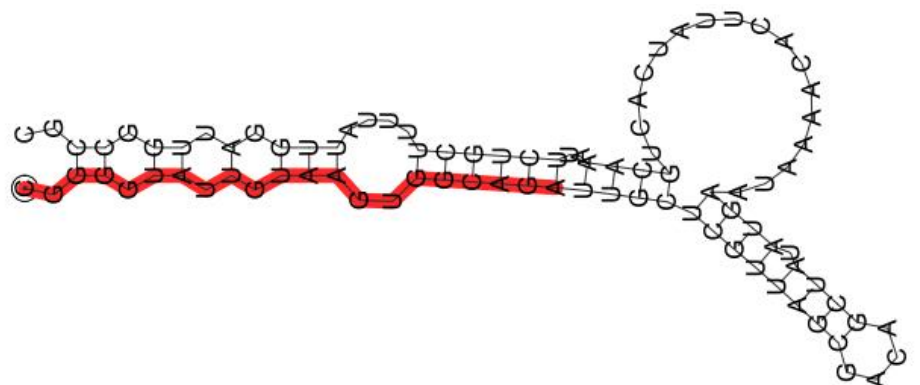

LC22

LC20

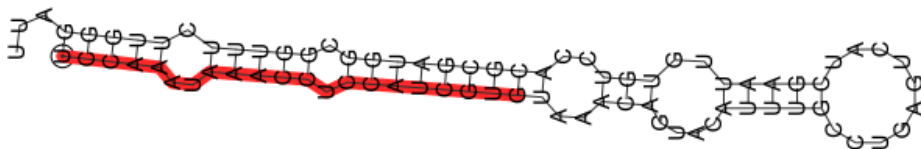

LC23

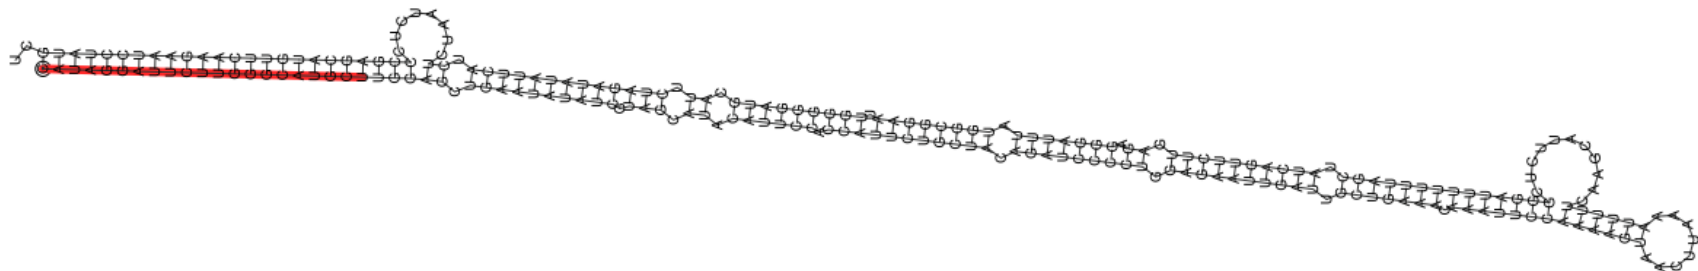

LC24

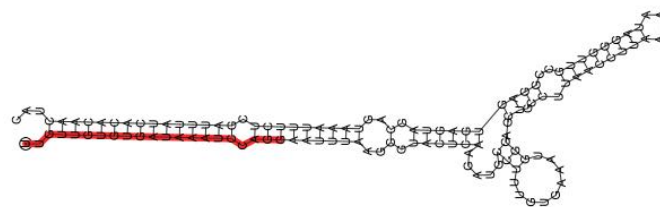

LC25

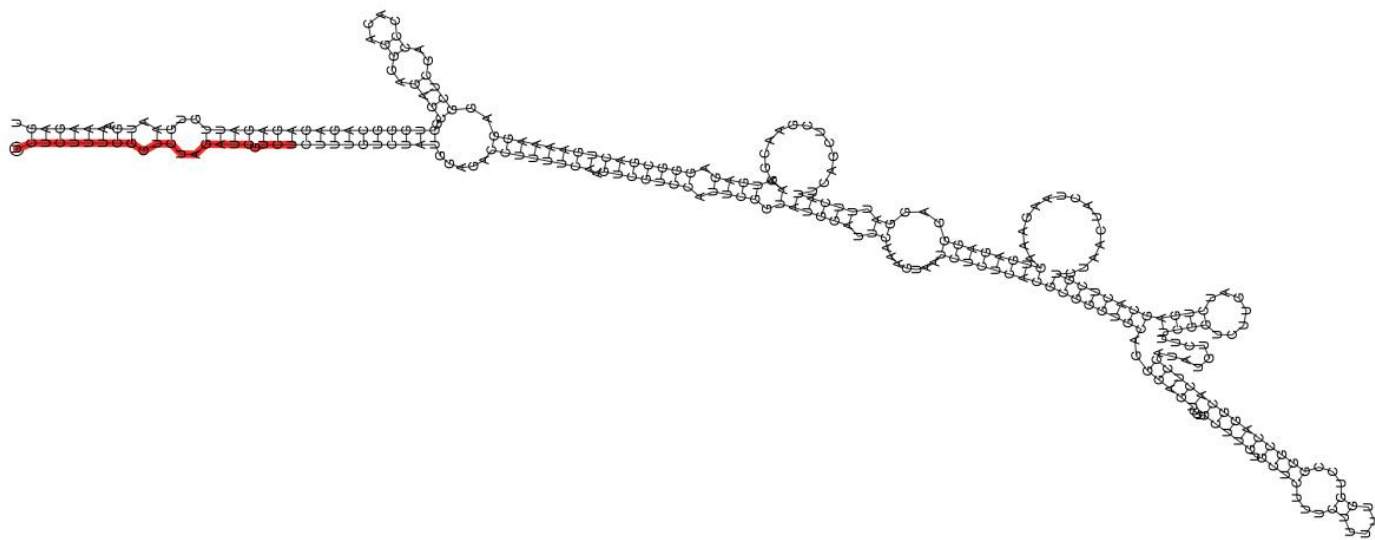

LC26

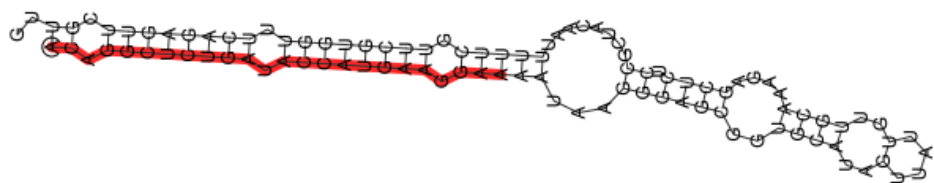

LC27

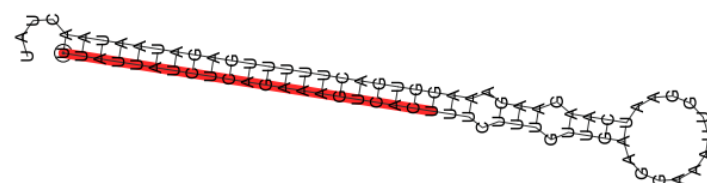

LC28

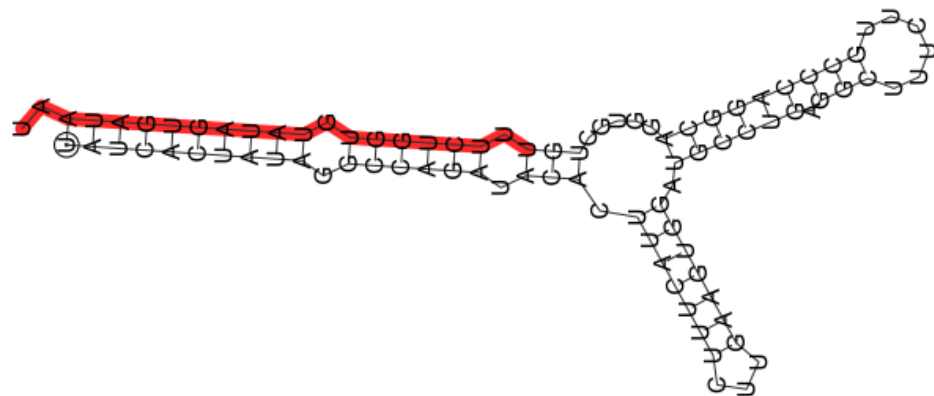

LC29

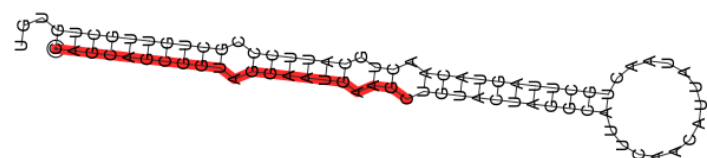

LC30

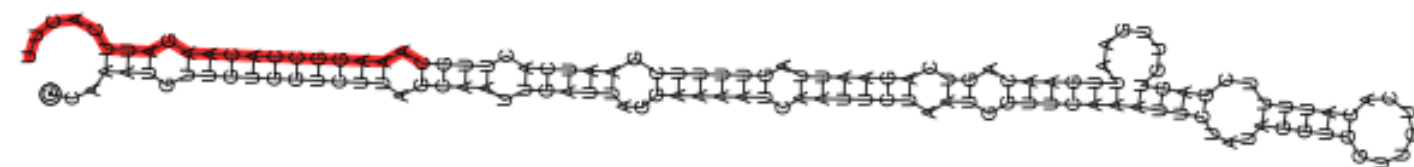

LC31

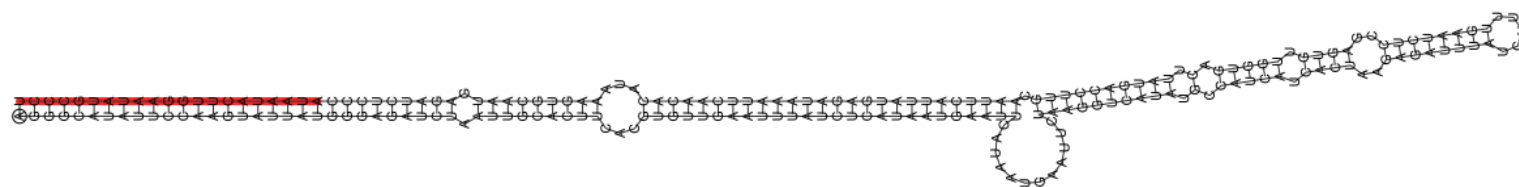

LC32

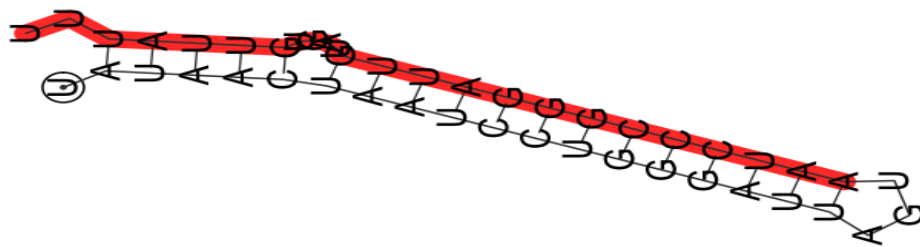

LC33

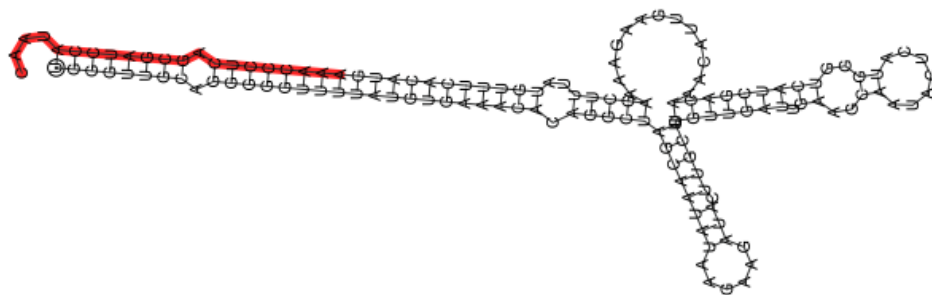

LC35

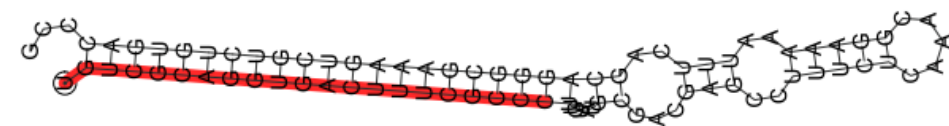

LC37

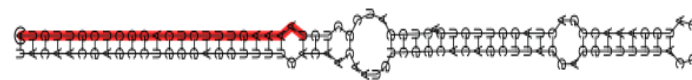

LC34

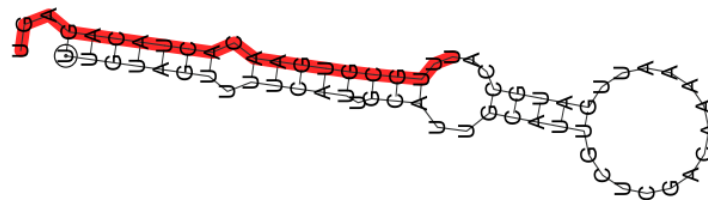

LC36

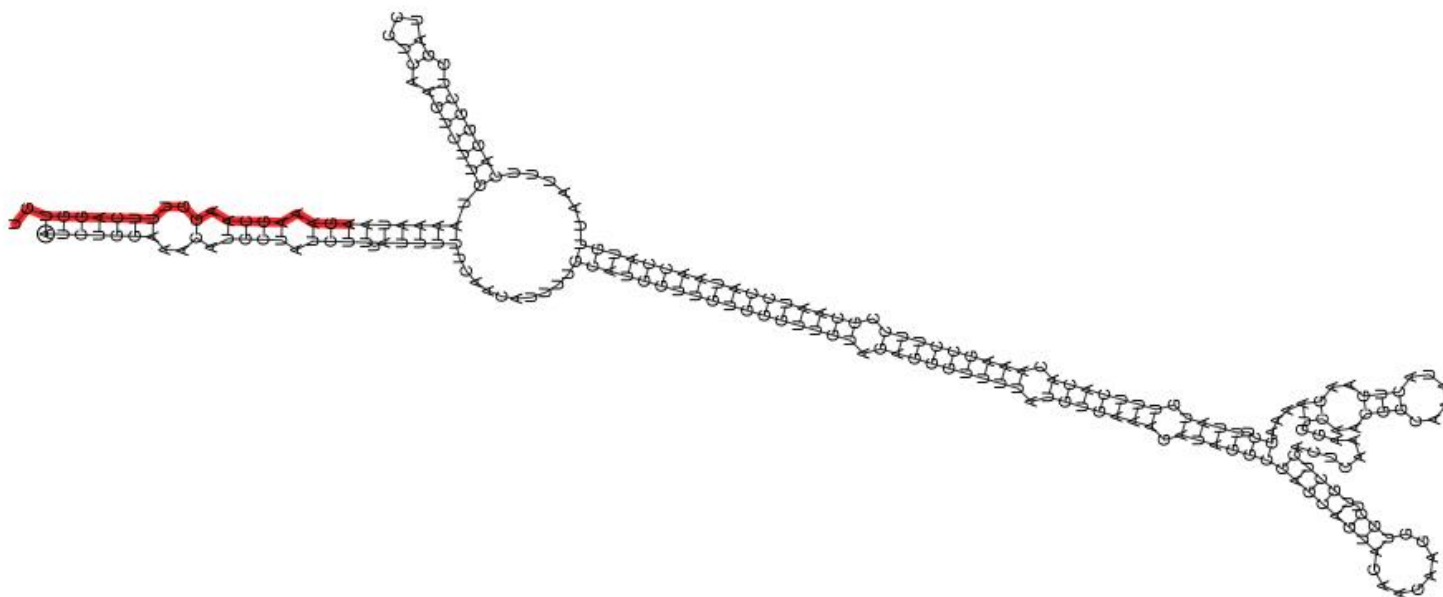

LC40

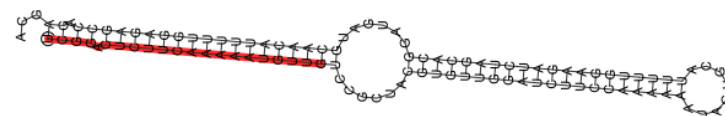

LC46

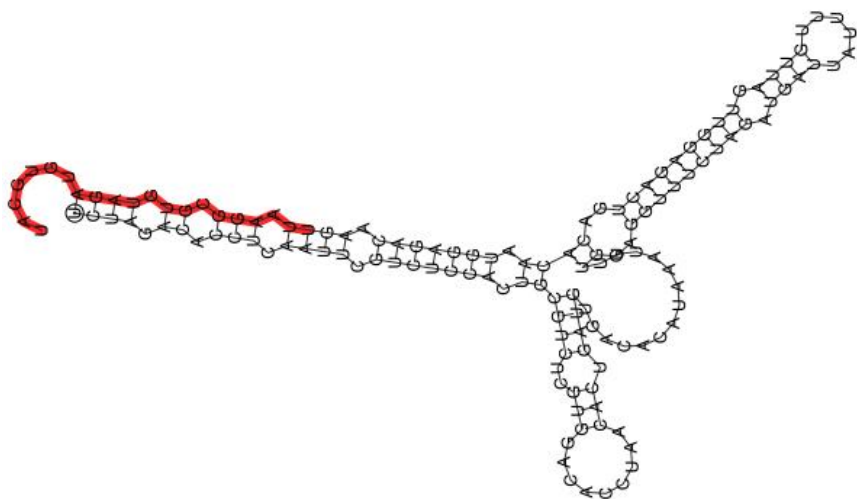

LC41
