# Supplementary material for: Identification of MicroRNAs and Target Genes in the Fruit and Shoot Tip of Lycium chinense: A Traditional Chinese Medicinal Plant
Source: PLoS One. 2015 Jan 14;10(1):e0116334. doi: 10.1371/journal.pone.0116334 (PMC4294688; doi:10.1371/journal.pone.0116334)
Supplement: S4 Table — (XLSX) [file pone.0116334.s006.xlsx]

## Sheet: Sheet1
Table S4: The most enriched pathways and target genes
Statistic method: hypergeometric test
Term	Database	Id	Sample number	Background number	P-Value	Corrected P-Value	Genes	Hyperlink
Spliceosome	KEGG PATHWAY	ko03040	6	268	0.00398701	1	comp53758_c0|comp33811_c0|comp287239_c0|comp58101_c0|comp32898_c0|comp33248_c0	http://www.genome.jp/kegg-bin/show_pathway?ko03040
2-Oxocarboxylic acid metabolism	KEGG PATHWAY	ko01210	3	103	0.0200322	1	comp51884_c0|comp33928_c0|comp50645_c0	http://www.genome.jp/kegg-bin/show_pathway?ko01210
Cell cycle - yeast	KEGG PATHWAY	ko04111	3	109	0.0232169	1	comp50426_c0|comp65991_c0|comp35919_c0	http://www.genome.jp/kegg-bin/show_pathway?ko04111
Nucleotide excision repair	KEGG PATHWAY	ko03420	2	57	0.0403926	1	comp50819_c0|comp47078_c0	http://www.genome.jp/kegg-bin/show_pathway?ko03420
Ascorbate and aldarate metabolism	KEGG PATHWAY	ko00053	2	61	0.0456564	1	comp67101_c0|comp34575_c0	http://www.genome.jp/kegg-bin/show_pathway?ko00053
Terpenoid backbone biosynthesis	KEGG PATHWAY	ko00900	2	72	0.0613158	1	comp34857_c0|comp56003_c0	http://www.genome.jp/kegg-bin/show_pathway?ko00900
Ubiquitin mediated proteolysis	KEGG PATHWAY	ko04120	3	173	0.0728309	1	comp35919_c0|comp64653_c0|comp50819_c0	http://www.genome.jp/kegg-bin/show_pathway?ko04120
Thiamine metabolism	KEGG PATHWAY	ko00730	1	14	0.0753624	1	comp56003_c0	http://www.genome.jp/kegg-bin/show_pathway?ko00730
Vasopressin-regulated water reabsorption	KEGG PATHWAY	ko04962	1	16	0.085658	1	comp31999_c0	http://www.genome.jp/kegg-bin/show_pathway?ko04962
Biosynthesis of secondary metabolites	KEGG PATHWAY	ko01110	12	1386	0.0866426	1	comp67101_c0|comp34575_c0|comp51884_c0|comp61326_c0|comp50645_c0|comp56003_c0|comp51400_c0|comp26573_c0|comp47329_c0|comp64824_c2|comp33928_c0|comp34857_c0	http://www.genome.jp/kegg-bin/show_pathway?ko01110
Amino sugar and nucleotide sugar metabolism	KEGG PATHWAY	ko00520	3	205	0.107275	1	comp67101_c0|comp26573_c0|comp34575_c0	http://www.genome.jp/kegg-bin/show_pathway?ko00520
Long-term depression	KEGG PATHWAY	ko04730	1	21	0.110902	1	comp50426_c0	http://www.genome.jp/kegg-bin/show_pathway?ko04730
Photosynthesis	KEGG PATHWAY	ko00195	2	102	0.111143	1	comp32680_c0|comp59965_c1	http://www.genome.jp/kegg-bin/show_pathway?ko00195
ABC transporters	KEGG PATHWAY	ko02010	1	24	0.125715	1	comp66410_c0	http://www.genome.jp/kegg-bin/show_pathway?ko02010
Metabolic pathways	KEGG PATHWAY	ko01100	19	2606	0.135899	1	comp33902_c0|comp66360_c1|comp66564_c1|comp34575_c0|comp64824_c2|comp63467_c0|comp61326_c0|comp63757_c0|comp41934_c0|comp50645_c0|comp67101_c0|comp51400_c0|comp26573_c0|comp33928_c0|comp28291_c0|comp47329_c0|comp56003_c0|comp34857_c0|comp62036_c0	http://www.genome.jp/kegg-bin/show_pathway?ko01100
Peroxisome	KEGG PATHWAY	ko04146	2	121	0.146597	1	comp34157_c0|comp50645_c0	http://www.genome.jp/kegg-bin/show_pathway?ko04146
Glutathione metabolism	KEGG PATHWAY	ko00480	2	127	0.158232	1	comp66360_c1|comp50645_c0	http://www.genome.jp/kegg-bin/show_pathway?ko00480
Tropane, piperidine and pyridine alkaloid biosynthesis	KEGG PATHWAY	ko00960	1	31	0.159333	1	comp51400_c0	http://www.genome.jp/kegg-bin/show_pathway?ko00960
Chagas disease (American trypanosomiasis)	KEGG PATHWAY	ko05142	1	35	0.177964	1	comp50426_c0	http://www.genome.jp/kegg-bin/show_pathway?ko05142
Ether lipid metabolism	KEGG PATHWAY	ko00565	1	36	0.182557	1	comp41934_c0	http://www.genome.jp/kegg-bin/show_pathway?ko00565
Biosynthesis of amino acids	KEGG PATHWAY	ko01230	4	400	0.185184	1	comp61326_c0|comp33928_c0|comp50645_c0|comp64824_c2	http://www.genome.jp/kegg-bin/show_pathway?ko01230
Lysine degradation	KEGG PATHWAY	ko00310	1	38	0.191668	1	comp51400_c0	http://www.genome.jp/kegg-bin/show_pathway?ko00310
Pantothenate and CoA biosynthesis	KEGG PATHWAY	ko00770	1	40	0.200677	1	comp33928_c0	http://www.genome.jp/kegg-bin/show_pathway?ko00770
Hepatitis C	KEGG PATHWAY	ko05160	1	40	0.200677	1	comp50426_c0	http://www.genome.jp/kegg-bin/show_pathway?ko05160
Mismatch repair	KEGG PATHWAY	ko03430	1	41	0.205145	1	comp47078_c0	http://www.genome.jp/kegg-bin/show_pathway?ko03430
Cyanoamino acid metabolism	KEGG PATHWAY	ko00460	1	42	0.209587	1	comp51884_c0	http://www.genome.jp/kegg-bin/show_pathway?ko00460
Valine, leucine and isoleucine biosynthesis	KEGG PATHWAY	ko00290	1	45	0.222768	1	comp33928_c0	http://www.genome.jp/kegg-bin/show_pathway?ko00290
beta-Alanine metabolism	KEGG PATHWAY	ko00410	1	46	0.227113	1	comp28291_c0	http://www.genome.jp/kegg-bin/show_pathway?ko00410
Sulfur metabolism	KEGG PATHWAY	ko00920	1	46	0.227113	1	comp33902_c0	http://www.genome.jp/kegg-bin/show_pathway?ko00920
Flavonoid biosynthesis	KEGG PATHWAY	ko00941	1	47	0.231433	1	comp47329_c0	http://www.genome.jp/kegg-bin/show_pathway?ko00941
N-Glycan biosynthesis	KEGG PATHWAY	ko00510	1	48	0.23573	1	comp66564_c1	http://www.genome.jp/kegg-bin/show_pathway?ko00510
GnRH signaling pathway	KEGG PATHWAY	ko04912	1	48	0.23573	1	comp41934_c0	http://www.genome.jp/kegg-bin/show_pathway?ko04912
Hippo signaling pathway - fly	KEGG PATHWAY	ko04391	1	52	0.25268	1	comp50426_c0	http://www.genome.jp/kegg-bin/show_pathway?ko04391
TGF-beta signaling pathway	KEGG PATHWAY	ko04350	1	53	0.256859	1	comp50426_c0	http://www.genome.jp/kegg-bin/show_pathway?ko04350
DNA replication	KEGG PATHWAY	ko03030	1	53	0.256859	1	comp47078_c0	http://www.genome.jp/kegg-bin/show_pathway?ko03030
Hepatitis B	KEGG PATHWAY	ko05161	1	55	0.265147	1	comp50819_c0	http://www.genome.jp/kegg-bin/show_pathway?ko05161
Carbon fixation pathways in prokaryotes	KEGG PATHWAY	ko00720	1	56	0.269257	1	comp50645_c0	http://www.genome.jp/kegg-bin/show_pathway?ko00720
Glutamatergic synapse	KEGG PATHWAY	ko04724	1	56	0.269257	1	comp41934_c0	http://www.genome.jp/kegg-bin/show_pathway?ko04724
Propanoate metabolism	KEGG PATHWAY	ko00640	1	59	0.281449	1	comp28291_c0	http://www.genome.jp/kegg-bin/show_pathway?ko00640
Ras signaling pathway	KEGG PATHWAY	ko04014	1	60	0.285469	1	comp41934_c0	http://www.genome.jp/kegg-bin/show_pathway?ko04014
Neurotrophin signaling pathway	KEGG PATHWAY	ko04722	1	60	0.285469	1	comp31999_c0	http://www.genome.jp/kegg-bin/show_pathway?ko04722
Phenylalanine, tyrosine and tryptophan biosynthesis	KEGG PATHWAY	ko00400	1	64	0.301323	1	comp61326_c0	http://www.genome.jp/kegg-bin/show_pathway?ko00400
Fatty acid biosynthesis	KEGG PATHWAY	ko00061	1	65	0.305232	1	comp52474_c1	http://www.genome.jp/kegg-bin/show_pathway?ko00061
Dopaminergic synapse	KEGG PATHWAY	ko04728	1	66	0.309119	1	comp50426_c0	http://www.genome.jp/kegg-bin/show_pathway?ko04728
Alanine, aspartate and glutamate metabolism	KEGG PATHWAY	ko00250	1	66	0.309119	1	comp62036_c0	http://www.genome.jp/kegg-bin/show_pathway?ko00250
Tight junction	KEGG PATHWAY	ko04530	1	69	0.320652	1	comp50426_c0	http://www.genome.jp/kegg-bin/show_pathway?ko04530
Hippo signaling pathway	KEGG PATHWAY	ko04390	1	69	0.320652	1	comp50426_c0	http://www.genome.jp/kegg-bin/show_pathway?ko04390
Valine, leucine and isoleucine degradation	KEGG PATHWAY	ko00280	1	75	0.343147	1	comp28291_c0	http://www.genome.jp/kegg-bin/show_pathway?ko00280
Fc gamma R-mediated phagocytosis	KEGG PATHWAY	ko04666	1	78	0.354115	1	comp41934_c0	http://www.genome.jp/kegg-bin/show_pathway?ko04666
Meiosis - yeast	KEGG PATHWAY	ko04113	1	81	0.364902	1	comp50426_c0	http://www.genome.jp/kegg-bin/show_pathway?ko04113
Progesterone-mediated oocyte maturation	KEGG PATHWAY	ko04914	1	84	0.37551	1	comp35919_c0	http://www.genome.jp/kegg-bin/show_pathway?ko04914
RNA transport	KEGG PATHWAY	ko03013	2	250	0.407496	1	comp53758_c0|comp59053_c0	http://www.genome.jp/kegg-bin/show_pathway?ko03013
Pentose phosphate pathway	KEGG PATHWAY	ko00030	1	96	0.416212	1	comp64824_c2	http://www.genome.jp/kegg-bin/show_pathway?ko00030
Citrate cycle (TCA cycle)	KEGG PATHWAY	ko00020	1	107	0.451204	1	comp50645_c0	http://www.genome.jp/kegg-bin/show_pathway?ko00020
Fructose and mannose metabolism	KEGG PATHWAY	ko00051	1	108	0.45428	1	comp26573_c0	http://www.genome.jp/kegg-bin/show_pathway?ko00051
Herpes simplex infection	KEGG PATHWAY	ko05168	1	109	0.457339	1	comp287239_c0	http://www.genome.jp/kegg-bin/show_pathway?ko05168
Glycerophospholipid metabolism	KEGG PATHWAY	ko00564	1	111	0.463405	1	comp41934_c0	http://www.genome.jp/kegg-bin/show_pathway?ko00564
Plant hormone signal transduction	KEGG PATHWAY	ko04075	2	285	0.473572	1	comp57294_c0|comp57045_c0	http://www.genome.jp/kegg-bin/show_pathway?ko04075
Oocyte meiosis	KEGG PATHWAY	ko04114	1	122	0.495588	1	comp50426_c0	http://www.genome.jp/kegg-bin/show_pathway?ko04114
Pyrimidine metabolism	KEGG PATHWAY	ko00240	1	148	0.564243	1	comp62036_c0	http://www.genome.jp/kegg-bin/show_pathway?ko00240
PI3K-Akt signaling pathway	KEGG PATHWAY	ko04151	1	154	0.57872	1	comp50426_c0	http://www.genome.jp/kegg-bin/show_pathway?ko04151
Cell cycle	KEGG PATHWAY	ko04110	1	162	0.597282	1	comp35919_c0	http://www.genome.jp/kegg-bin/show_pathway?ko04110
Viral carcinogenesis	KEGG PATHWAY	ko05203	1	166	0.606256	1	comp50819_c0	http://www.genome.jp/kegg-bin/show_pathway?ko05203
Carbon fixation in photosynthetic organisms	KEGG PATHWAY	ko00710	1	174	0.623614	1	comp64824_c2	http://www.genome.jp/kegg-bin/show_pathway?ko00710
Microbial metabolism in diverse environments	KEGG PATHWAY	ko01120	3	576	0.626774	1	comp33902_c0|comp50645_c0|comp64824_c2	http://www.genome.jp/kegg-bin/show_pathway?ko01120
mRNA surveillance pathway	KEGG PATHWAY	ko03015	1	179	0.634075	1	comp50426_c0	http://www.genome.jp/kegg-bin/show_pathway?ko03015
Parkinson's disease	KEGG PATHWAY	ko05012	1	188	0.652182	1	comp63757_c0	http://www.genome.jp/kegg-bin/show_pathway?ko05012
Purine metabolism	KEGG PATHWAY	ko00230	1	190	0.656083	1	comp258602_c0	http://www.genome.jp/kegg-bin/show_pathway?ko00230
Carbon metabolism	KEGG PATHWAY	ko01200	2	418	0.680036	1	comp50645_c0|comp64824_c2	http://www.genome.jp/kegg-bin/show_pathway?ko01200
Endocytosis	KEGG PATHWAY	ko04144	1	204	0.682204	1	comp41934_c0	http://www.genome.jp/kegg-bin/show_pathway?ko04144
Alzheimer's disease	KEGG PATHWAY	ko05010	1	212	0.696236	1	comp63757_c0	http://www.genome.jp/kegg-bin/show_pathway?ko05010
Huntington's disease	KEGG PATHWAY	ko05016	1	251	0.756313	1	comp63757_c0	http://www.genome.jp/kegg-bin/show_pathway?ko05016
Starch and sucrose metabolism	KEGG PATHWAY	ko00500	1	278	0.790839	1	comp63467_c0	http://www.genome.jp/kegg-bin/show_pathway?ko00500
Oxidative phosphorylation	KEGG PATHWAY	ko00190	1	279	0.79202	1	comp63757_c0	http://www.genome.jp/kegg-bin/show_pathway?ko00190
Ribosome	KEGG PATHWAY	ko03010	2	658	0.885323	1	comp53528_c0|comp181588_c0	http://www.genome.jp/kegg-bin/show_pathway?ko03010
